# Supplementary material for: Critical Role of Spns2, a Sphingosine-1-Phosphate Transporter, in Lung Cancer Cell Survival and Migration
Source: PubMed Central journal article supplement (PMC4203763; doi:10.1371/journal.pone.0110119), 2014-10-20

**Figure S1**

**A**

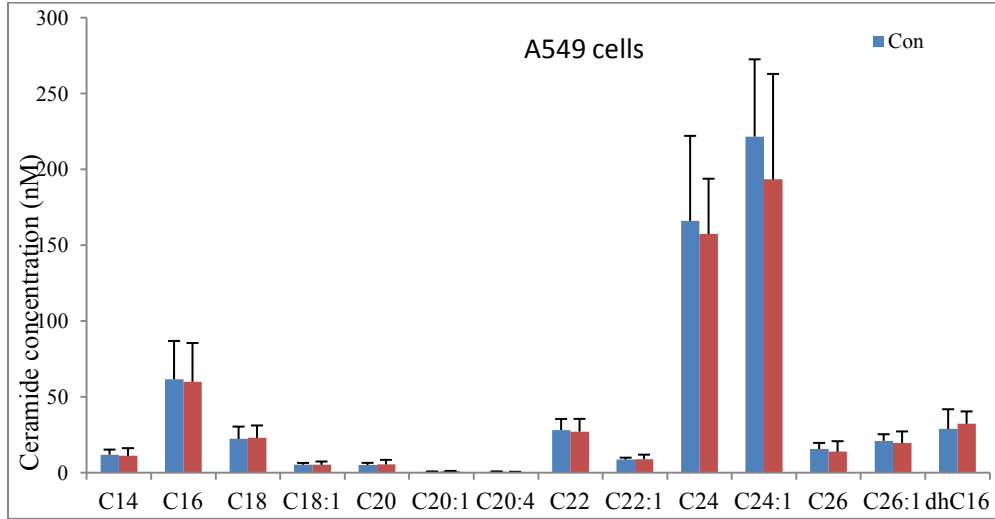

**B**

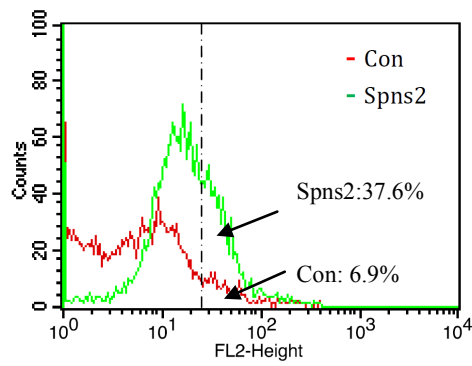

**C**

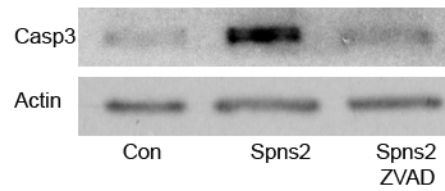

**D**

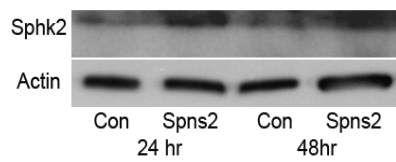

**E**

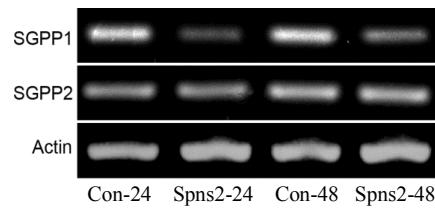

**F**

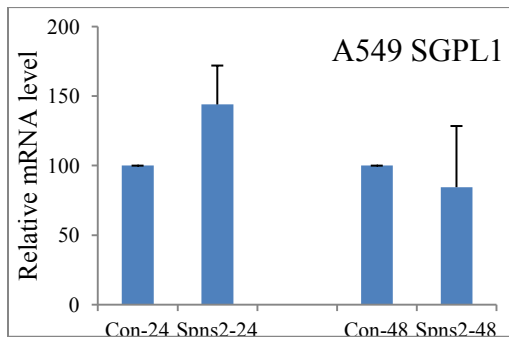

Supplement: pone.0110119.s001.pdf [file pone.0110119.s001.pdf]
